# Supplementary material for: Transdiagnostic monoamine-based subtyping for attention- deficit/hyperactivity disorder and autism spectrum disorder via unsupervised machine learning
Source: Research Square preprint supplement (doi:10.21203/rs.3.rs-8477091/v1), 2026-01-12
Supplement: Supplementary file 2 [file 5be76e1479e13c8d767500b3.docx]

**Journal of Neural Transmission**

**Transdiagnostic monoamine-based subtyping for attention-deficit/hyperactivity disorder and autism spectrum disorder via unsupervised machine learning**

Masatoshi Yamashita 1,2*, Qiulu Shou 1,2, Sayo Hamatani 1,2,3, Hideo Matsuzaki 1,2,3, Masanori Fujieda 1,2,3, Yoshiyuki Hirano 2,4, Kuriko Kagitani-Shimono 2,5, Hidehiko Okazawa 2,6, and Yoshifumi Mizuno 1,2,3#

***Corresponding author**

Masatoshi Yamashita, Research Center for Child Mental Development, University of Fukui, Fukui, Japan, email: myamashita.fatiguepsychology@gmail.com

**#Co-corresponding author**

Yoshifumi Mizuno, Research Center for Child Mental Development, University of Fukui, Fukui, Japan, email: mizunoy@u-fukui.ac.jp

**Online Resource 4 Table.** Brain areas with significantly smaller gray matter volume in the NDD-B type than in the TD group

|  | MNI coordinates | | |  |  |  |
| --- | --- | --- | --- | --- | --- | --- |
| Location | x | y | z | Cluster size | TFCE | FWE-P |
| Left posterior orbital gyrus | -22 | 16 | -28 | 15166 | 307.75 | 0.001 |
| Left posterior cingulate gyrus | -2 | -46 | 14 | 674 | 222.96 | 0.003 |
| Right superior frontal gyrus | 28 | -4 | 68 | 941 | 152.63 | 0.014 |
| Left cuneus | 0 | -78 | 36 | 118 | 150.68 | 0.014 |
| Left precuneus | 0 | -54 | 63 | 626 | 150.67 | 0.014 |
| Right supplementary motor cortex | 15 | 8 | 54 | 297 | 146.54 | 0.016 |
| Left middle frontal gyrus | -34 | 10 | 42 | 149 | 135.97 | 0.019 |
| Left superior occipital gyrus | -22 | -86 | 44 | 20 | 127.12 | 0.023 |
| Right posterior insula | 39 | 2 | -20 | 17 | 124.87 | 0.025 |

FWE, family-wise error; MNI, Montreal Neurological Institute; NDD, neurodevelopmental disorder; TD, typical development; TFCE, threshold-free cluster enhancement.
