# Supplementary material for: Transdiagnostic monoamine-based subtyping for attention- deficit/hyperactivity disorder and autism spectrum disorder via unsupervised machine learning
Source: Research Square preprint supplement (doi:10.21203/rs.3.rs-8477091/v1), 2026-01-12
Supplement: Supplementary file 3 [file 61b37ffb8100bdd85fab1036.docx]

**Journal of Neural Transmission**

**Transdiagnostic monoamine-based subtyping for attention-deficit/hyperactivity disorder and autism spectrum disorder via unsupervised machine learning**

Masatoshi Yamashita 1,2*, Qiulu Shou 1,2, Sayo Hamatani 1,2,3, Hideo Matsuzaki 1,2,3, Masanori Fujieda 1,2,3, Yoshiyuki Hirano 2,4, Kuriko Kagitani-Shimono 2,5, Hidehiko Okazawa 2,6, and Yoshifumi Mizuno 1,2,3#

***Corresponding author**

Masatoshi Yamashita, Research Center for Child Mental Development, University of Fukui, Fukui, Japan, email: myamashita.fatiguepsychology@gmail.com

**#Co-corresponding author**

Yoshifumi Mizuno, Research Center for Child Mental Development, University of Fukui, Fukui, Japan, email: mizunoy@u-fukui.ac.jp

**Online Resource 2: Additional demographics and behavioral symptoms**

The demographic data for each subtype are presented in **Online Resource 2 Table**. Compared to the TD group, the NDD-A type showed significant differences in sex ratio, income, and intelligence quotient. Similarly, the NDD-B type showed significant differences in age, education, sex ratio, income, and intelligence quotient.

The behavioral symptoms data are shown in **Online Resource 2 Table**. Welch’s one-way ANOVA showed significant main effects of group on the SRS-2 total score (*F* [2.00, 42.69] = 62.02, *p* < 0.001, generalized η2 = 0.43), SSP total score (*F* [2.00, 40.51] = 38.40, *p* < 0.001, generalized η2 = 0.32), inattention score (*F* [2.00, 43.14] = 40.16, *p* < 0.001, generalized η2 = 0.33), hyperactivity/impulsivity score (*F* [2.00, 39.81] = 49.04, *p* < 0.001, generalized η2 = 0.38), and fatigue score (*F* [2.00, 43.27] = 21.72, *p* < 0.001, generalized η2 = 0.21). The simple main effects analyses revealed that the NDD-A and NDD-B types had higher SRS-2 total, SSP total, inattention, hyperactivity/impulsivity, and fatigue scores than the TD group. However, there were no significant differences between NDD subtypes in these measures. For chronotype, one-way ANOVA showed a significant main effect of group (*F* [2, 150] = 4.58, *p* = 0.011, partial η2 = 0.06). The simple main effect analyses revealed that the NDD-B type had a greater chronotype than the TD group. However, the NDD-A type did not show such significant differences compared to either the TD group or the NDD-B type. These results indicate that although both NDD subtypes had higher levels of difficulties in social communication and sensory processing, inattention, hyperactivity/impulsivity, and fatigue compared to the TD group, their severity did not differ between the NDD subtypes. Moreover, only the NDD-B type showed a delayed chronotype compared to the TD group.

**Online Resource 2 Table.** Demographics and behavioral symptoms of the typical development group and each neurodevelopmental disorder subtype

| Characteristic | TD  (n = 83) | NDD-A  (n = 18) | NDD-B  (n = 65) | *P*-value |
| --- | --- | --- | --- | --- |
| Age (years) | 10.76 (2.97) | 11.39 (2.33) | 11.85 (3.33) | 0.400  0.037 |
| Education (years) | 6.19 (2.96) | 7.00 (2.17) | 7.34 (3.28) | 0.191  0.027 |
| Sex (n)  Male  Female | 39  44 | 16  2 | 58  7 | 0.002  < 0.001 |
| Annual household income (JPY) (n) | | | | |
| < 3 000 000  3 000 000-5 000 000  5 000 000-7 000 000  ≥7 000 000 | 6  9  20  48 | 4  5  6  3 | 6  19  11  29 | < 0.001  0.032 |
| Diagnosis (n)  ADHD  ASD  ADHD+ASD | NA | 5  2  11 | 16  19  30 | NA |
| Handedness (n)  Right  Left  Ambidextrous | 78  3  2 | 16  2  0 | 59  6  0 | 0.340  0.174 |
| Intelligence quotient (score) | 106.28 (12.77) | 92.17 (11.85) | 97.94 (12.79) | < 0.001  < 0.001 |
| SRS-2 (score) | 45.90 (7.60) | 61.11 (12.19) | 64.49 (12.45) | a: < 0.001  b: < 0.001  c: 0.650 |
| SSP (score) | 45.98 (8.60) | 64.61 (18.23) | 64.57 (16.87) | a: < 0.001  b: < 0.001  c: > 0.999 |
| Inattention (score) | 47.99 (8.24) | 65.50 (12.45) | 63.02 (13.90) | a: < 0.001  b: < 0.001  c: > 0.999 |
| Hyperactivity/Impulsivity (score) | 44.89 (6.00) | 62.22 (14.04) | 60.40 (12.97) | a: < 0.001  b: < 0.001  c: > 0.999 |
| Fatigue (score) | 4.72 (4.53) | 11.83 (7.03) | 10.12 (6.37) | a: < 0.001  b: < 0.001  c: 0.760 |
| Chronotype (MSFsc, h) | 2.82 (0.92) | 3.19 (1.10) | 3.35 (1.17) | a: 0.550  b: 0.010  c: > 0.999 |

Parameters are indicated as the mean (*SD*) or n. *P*-values for age, education, income, and intelligence quotient are from *t*-tests for the comparison of TD with each NDD subtype. *P*-values for sex ratio and handedness ratio are from chi-square tests for the comparison of TD with each NDD subtype. *P*-values are from Welch’s one-way analysis of variance with Bonferroni correction for multiple comparisons. a, TD vs. NDD-A; ADHD, attention deficit hyperactivity disorder; ASD, autism spectrum disorder; b, TD vs. NDD-B; c, NDD-A vs. NDD-B; MSFsc, midpoint of sleep on free days, corrected for sleep debt; NA, not applicable; NDD, neurodevelopmental disorder; SD, standard deviation; SSP, Short Sensory Profile; SRS, Social Responsiveness Scale; TD, typical development.
