# Supplementary material for: Transdiagnostic monoamine-based subtyping for attention- deficit/hyperactivity disorder and autism spectrum disorder via unsupervised machine learning
Source: Research Square preprint supplement (doi:10.21203/rs.3.rs-8477091/v1), 2026-01-12
Supplement: Supplementary file 4 [file b81df7f89d4bee69db70a8e8.docx]

**Journal of Neural Transmission**

**Transdiagnostic monoamine-based subtyping for attention-deficit/hyperactivity disorder and autism spectrum disorder via unsupervised machine learning**

Masatoshi Yamashita 1,2*, Qiulu Shou 1,2, Sayo Hamatani 1,2,3, Hideo Matsuzaki 1,2,3, Masanori Fujieda 1,2,3, Yoshiyuki Hirano 2,4, Kuriko Kagitani-Shimono 2,5, Hidehiko Okazawa 2,6, and Yoshifumi Mizuno 1,2,3#

***Corresponding author**

Masatoshi Yamashita, Research Center for Child Mental Development, University of Fukui, Fukui, Japan, email: myamashita.fatiguepsychology@gmail.com

**#Co-corresponding author**

Yoshifumi Mizuno, Research Center for Child Mental Development, University of Fukui, Fukui, Japan, email: mizunoy@u-fukui.ac.jp

**Online Resource 3: Other cognitive performances**

Cognitive data are shown in **Fig. 2a** of the main text and in **Online Resource 3 Fig**. In the main effect of group in the linear mixed-effect model, there were no significant differences between the NDD-A type and TD group for the TMT-A (*β* = -0.10 95% CI [-0.68, 0.48], *R*2 = 0.001, *t* = 0.34, *p*-FDR = 0.731, *p*-FWE > 0.999), TMT-B (*β* = 0.37, 95% CI [-0.20, 0.95], *R*2 = 0.02, *t* = 1.27, *p*-FDR = 0.308, *p*-FWE = 0.617), TMT-Δ (*β* = 0.48, 95% CI [-0.08, 1.06], *R*2 = 0.04, *t* = 1.65, *p*-FDR = 0.304, *p*-FWE = 0.608), stop signal task (stop signal reaction time, *β* = -0.17, 95% CI [-0.75, 0.40], *R*2 = 0.03, *t* = 0.60, *p*-FDR = 0.862, *p*-FWE > 0.999; direction errors on go trials, *β* = -0.003, 95% CI [-0.59, 0.58], *R*2 = 0.0005, *t* = 0.01, *p*-FDR = 0.991, *p*-FWE > 0.999; direction errors on stop trials, *β* = 0.16, 95% CI [-0.41, 0.75], *R*2 = 0.04, *t* = 0.56, *p*-FDR = 0.862, *p*-FWE > 0.999), and spatial working memory task (between errors, *β* = 0.40, 95% CI [-0.17, 0.99], *R*2 = 0.03, *t* = 1.36, *p*-FDR = 0.175, *p*-FWE = 0.350; within errors, *β* = 0.66, 95% CI [0.09, 1.23], *R*2 = 0.05, *t* = 2.30, *p*-FDR = 0.046, *p*-FWE = 0.093). Moreover, there were no significant differences between the NDD-B type and TD groups for the TMT-A (*β* = 0.31, 95% CI [-0.02, 0.65], *R*2 = 0.32, *t* = 1.81, *p*-FDR = 0.071, *p*-FWE = 0.142), stop signal reaction time (*β* = 0.14, 95% CI [-0.18, 0.47], *R*2 = 0.31, *t* = 0.88, *p*-FDR = 0.377, *p*-FWE = 0.754) and direction error on stop trials (*β* = 0.43, 95% CI [0.04, 0.82], *R*2 = 0.06, *t* = 2.19, *p*-FDR = 0.044, *p*-FWE = 0.089) in the stop signal task, and spatial working memory task (between errors, *β* = 0.35, 95% CI [-0.008, 0.71], *R*2 = 0.15, *t* = 1.91, *p*-FDR = 0.115, *p*-FWE = 0.230; within errors, *β* = 0.06, 95% CI [-0.31, 0.43], *R*2 = 0.02, *t* = 0.32, *p*-FDR = 0.742, *p*-FWE > 0.999).


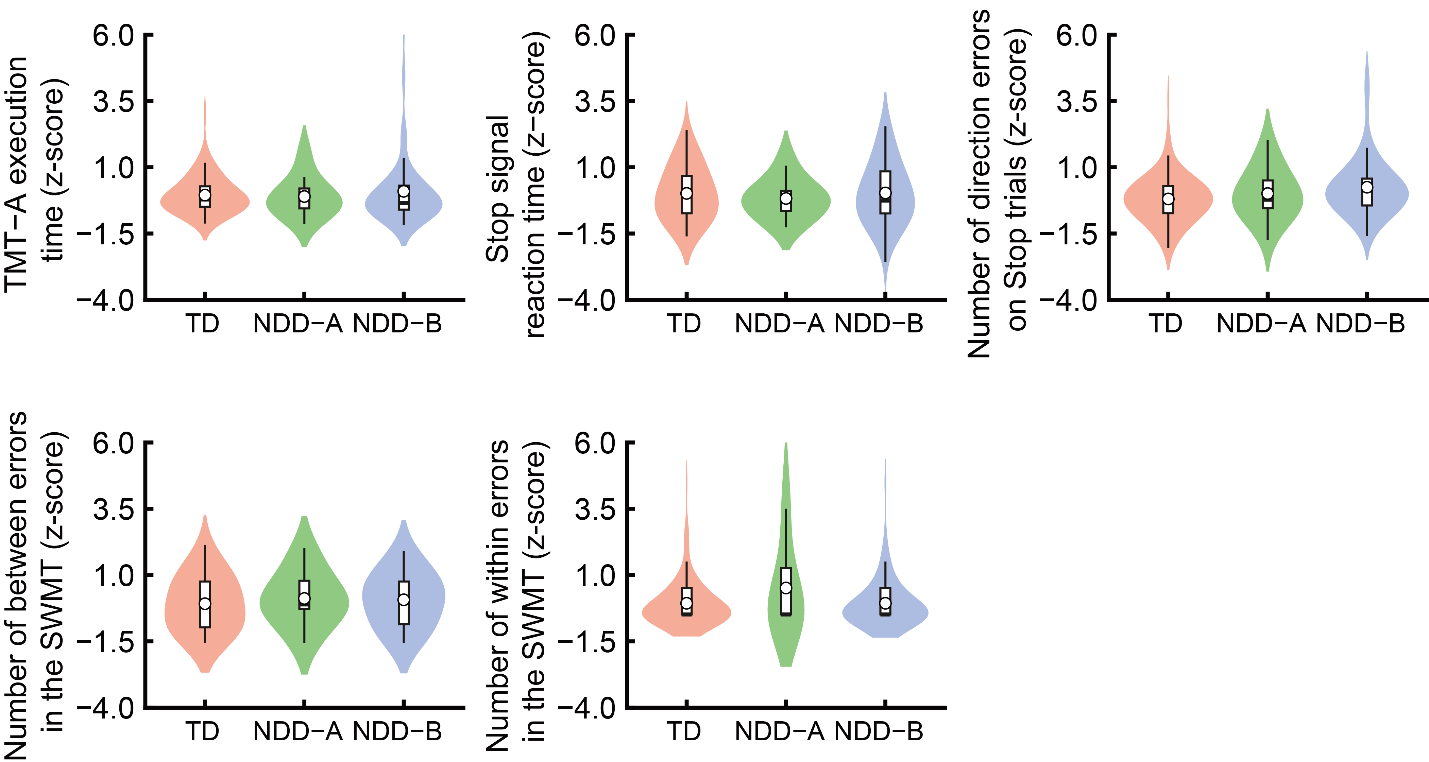


Online Resource 3 Fig. Cognitive results for each NDD subtype and the TD group. The NDD-A and NDD-B types did not show significant differences for the TMT-A, stop signal reaction time and direction errors on stop trials in the SST, and between errors and within errors in the SWMT. NDD, neurodevelopmental disorder; SST, stop signal task; SWMT, spatial working memory task; TD, typical development; TMT, trail making test.
